# Supplementary material for: CCL27 is a crucial regulator of immune homeostasis of the skin and mucosal tissues
Source: PubMed Central journal article supplement — iScience. 2022 May 18;25(6):104426. doi: 10.1016/j.isci.2022.104426 (PMC9157018; doi:10.1016/j.isci.2022.104426), 2022-05-18
Supplement: mmc1.pdf [file mmc1.pdf]

iScience, Volume 25

## **Supplemental information**

### **CCL27 is a crucial regulator of immune homeostasis of the skin and mucosal tissues**

**Micha L. Davila, Ming Xu, Chengyu Huang, Erin R. Gaddes, Levi Winter, Margherita T. Cantorna, Yong Wang, and Na Xiong**

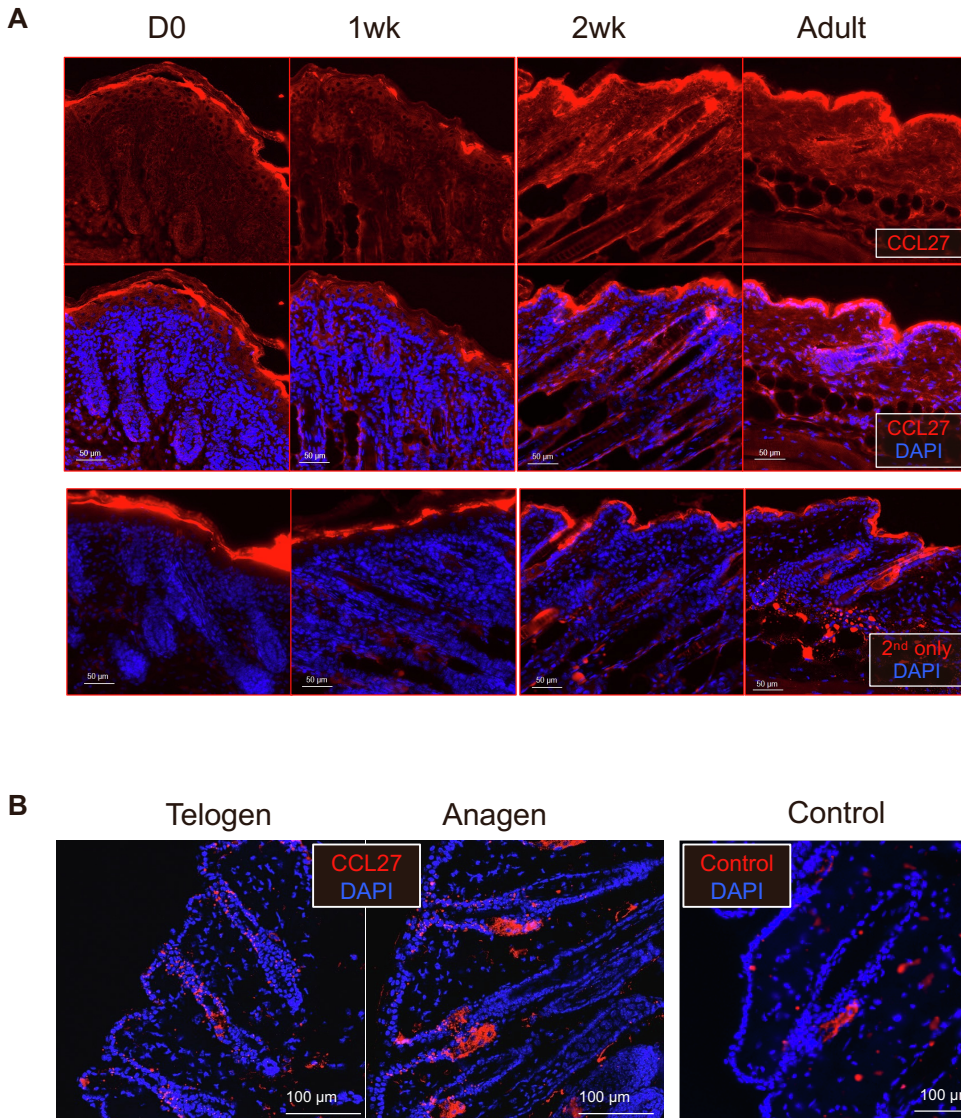

**Figure S1. Preferential localization of CCR10<sup>+</sup> lymphocytes near anagen phase hair follicles correlates with high CCL27 expression by follicular keratinocytes, related to Figure 1.** **A)** Representative immunofluorescent skin sections (14 $\mu$ m) stained with anti-CCL27 antibody. N=7 mice for D0, 1 week, and adult ages and 6 mice for 2 weeks. **B)** Fluorescent images (7 $\mu$ m) representative of skin at resting (telogen) and growing (anagen) phase of hair follicle cycling stained by *in-situ* hybridization with an antisense CCL27 RNA probe or a non-specific RNA probe. The control probe recognizes the DapB gene (accession # EF191515) of a soil bacterial strain *Bacillus subtilis* SMY. N=3 mice per HF cycle phase. Large red patches are non-specific signals of sebaceous glands that are found in both CCL27 and control probe-stained sections.

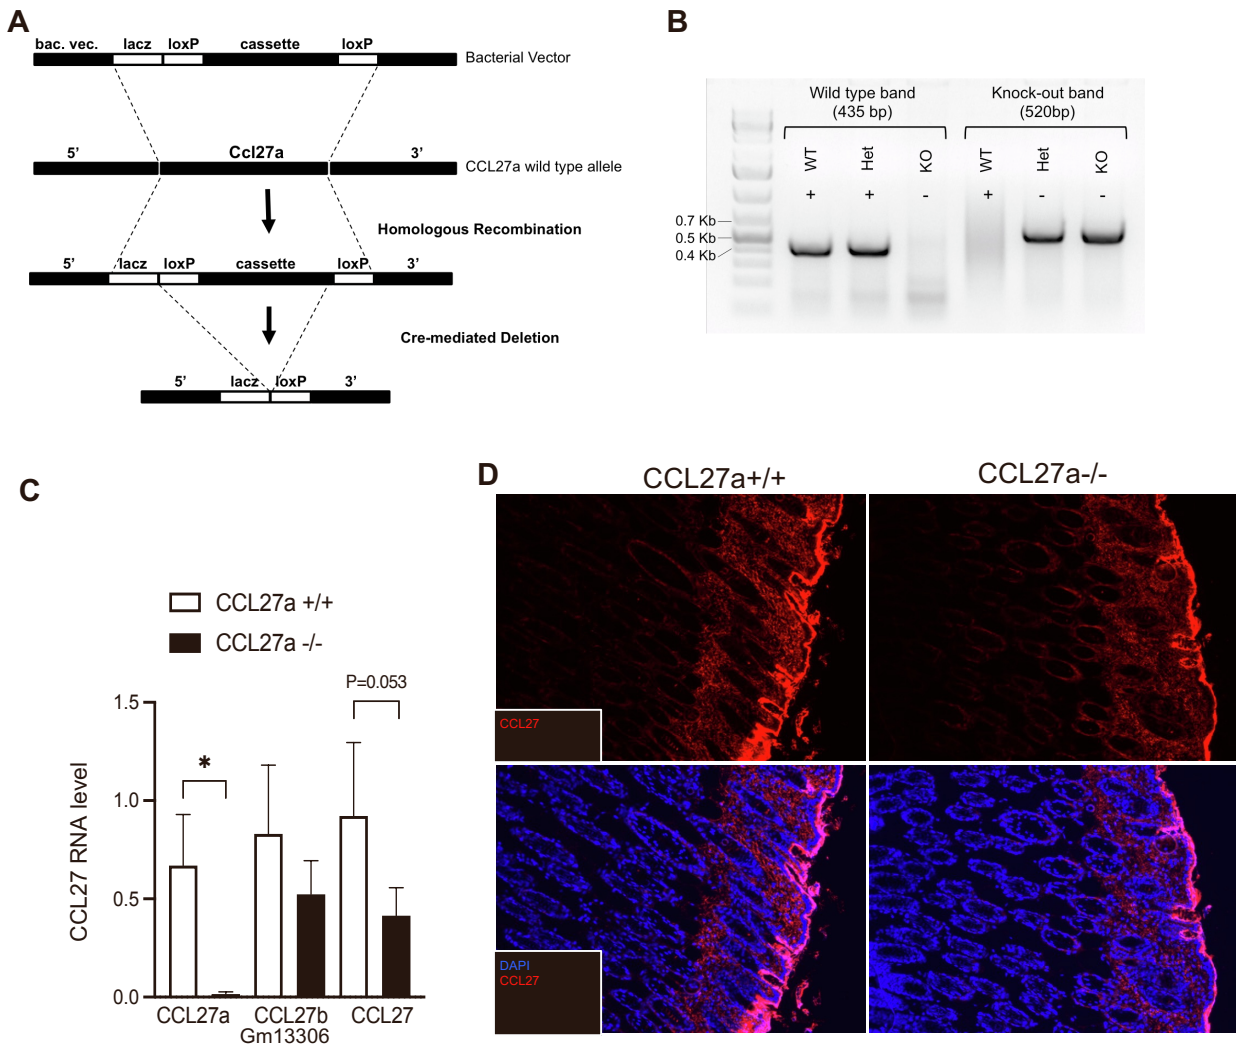

**Figure S2. CCL27a-knockout has little effect on the establishment of CCR10<sup>+</sup> lymphocytes in the skin, related to Figure 2.** **A)** Diagram of the CCL27a-targeting strategy in the CCL27a-knockout mouse line, modified from information obtained from the KOMP Repository ([https://www.mmrrc.org/catalog/sds.php?mmrrc\\_id=46967](https://www.mmrrc.org/catalog/sds.php?mmrrc_id=46967)). **B)** Genomic PCR genotyping CCL27a<sup>+/+</sup> (WT), heterozygous CCL27a<sup>+/-</sup> (Het), and homozygous CCL27a<sup>-/-</sup> knockout (KO) mice. Band sizes of CCL27a-WT and CCL27a-KO alleles are 435bp and 520bp respectively. **C)** Representative immunofluorescent skin sections (15µm) from CCL27a<sup>-/-</sup> and CCL27a<sup>+/+</sup> mice stained with anti-CCL27 antibody. **D)** Real-time RT-PCR analysis of total CCL27, CCL27a, and CCL27b/Gm13306 expression in the skin of CCL27a<sup>-/-</sup> and CCL27a<sup>+/+</sup> mice. Normalized to β-actin. N=6 mice for each genotype. The predicted coding sequences of CCL27b and Gm13306 are the same.

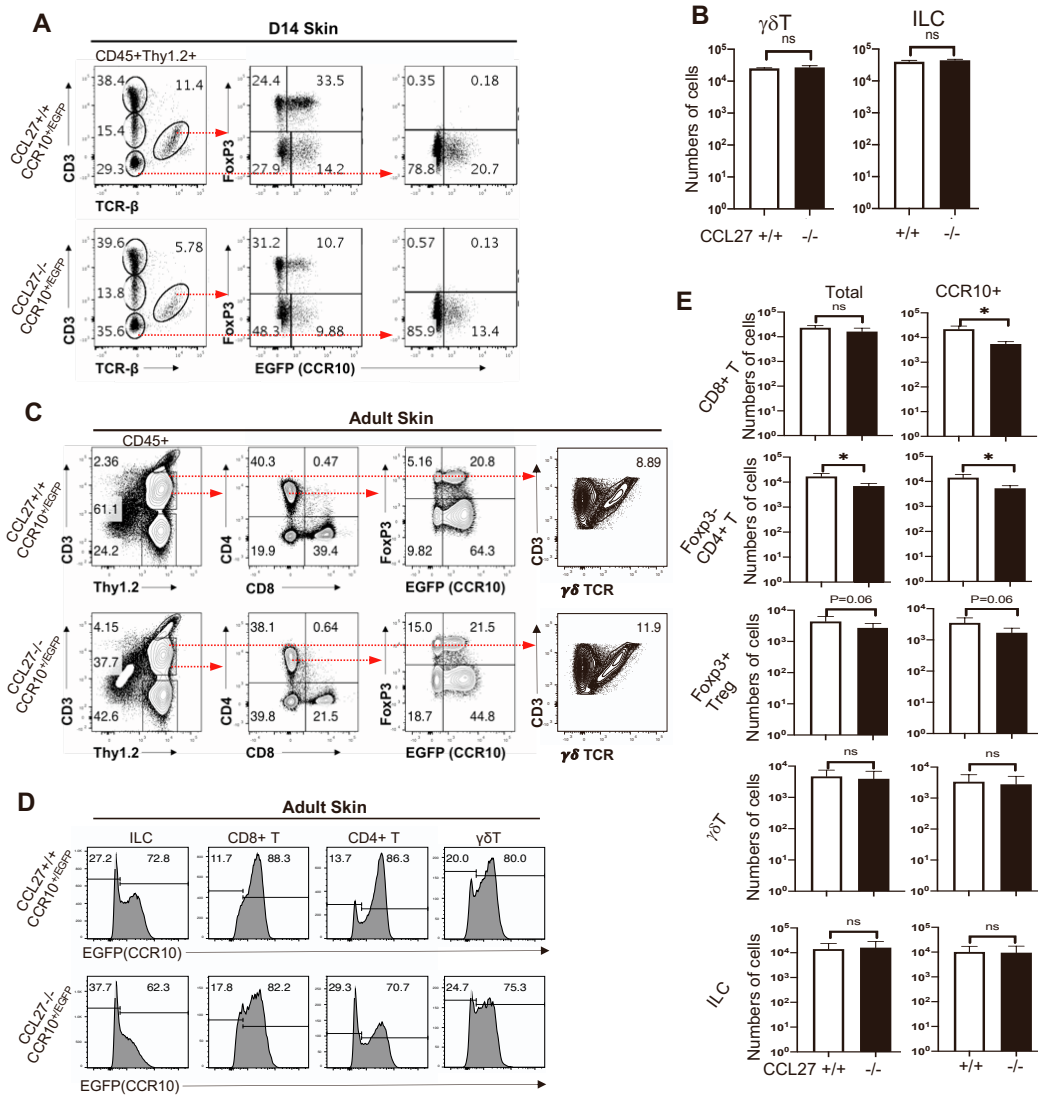

**Figure S3. Dysregulated presence of CCR10<sup>+</sup> lymphocytes in the skin of total CCL27-knockout mice, related to Figure 4.** **A-B)** FC analysis (A) of skin lymphocytes (CD45<sup>+</sup>Thy1.1<sup>+</sup>) for numbers of different T cell subsets and ILCs (B) in two week-old CCL27<sup>+/+</sup>CCR10<sup>+/EGFP</sup> and CCL27<sup>-/-</sup>CCR10<sup>+/EGFP</sup> mice. αβT cells are CD3<sup>int</sup>TCRβ<sup>+</sup>. Treg cells are CD3<sup>int</sup>TCRβ<sup>+</sup>Foxp3<sup>+</sup>. ILCs are CD3<sup>-</sup>TCRβ<sup>-</sup>. γδT cells are CD3<sup>int</sup>TCRβ<sup>-</sup> (excluding the CD3<sup>high</sup> dendritic epidermal γδT cells). N=5 for CCL27<sup>+/+</sup> and 4 for CCL27<sup>-/-</sup> mice. **C)** FC analysis of skin CD45<sup>+</sup> immune cells of adult CCL27<sup>+/+</sup>CCR10<sup>+/EGFP</sup> and CCL27<sup>-/-</sup>CCR10<sup>+/EGFP</sup> mice for different subsets of T cells and ILCs. **D)** Histograms of CCR10(EGFP) expression in the gated populations of skin T cell subsets and ILCs of adult CCL27<sup>+/+</sup>CCR10<sup>+/EGFP</sup> and CCL27<sup>-/-</sup>CCR10<sup>+/EGFP</sup> mice. CD8<sup>+</sup> and CD4<sup>+</sup> T cells are gated on CD8<sup>+</sup> and CD4<sup>+</sup> CD45<sup>+</sup>Thy1.2<sup>+</sup>CD3<sup>int</sup>. ILCs are CD45<sup>+</sup>Thy1.2<sup>+</sup>CD3<sup>-</sup>. γδT cells are CD45<sup>+</sup>Thy1.2<sup>+</sup>CD3<sup>int</sup>TCRγδ<sup>+</sup> (excluding CD3<sup>high</sup> dendritic epidermal γδT cells). **E)** Numbers of total and CCR10<sup>+</sup> CD8<sup>+</sup>, Foxp3<sup>-</sup>CD4<sup>+</sup>, Foxp3<sup>+</sup>Treg, γδ T cells and ILCs in adult CCL27<sup>+/+</sup>CCR10<sup>+/EGFP</sup> and CCL27<sup>-/-</sup>CCR10<sup>+/EGFP</sup> mice. N=11 samples each for total CD8<sup>+</sup> T cells, 5 each for CCR10<sup>+</sup> CD8<sup>+</sup> T cells, 5 each for Foxp3<sup>-</sup>CD4<sup>+</sup> and Foxp3<sup>+</sup>Treg cells, and 4 each for γδT cells and ILCs.



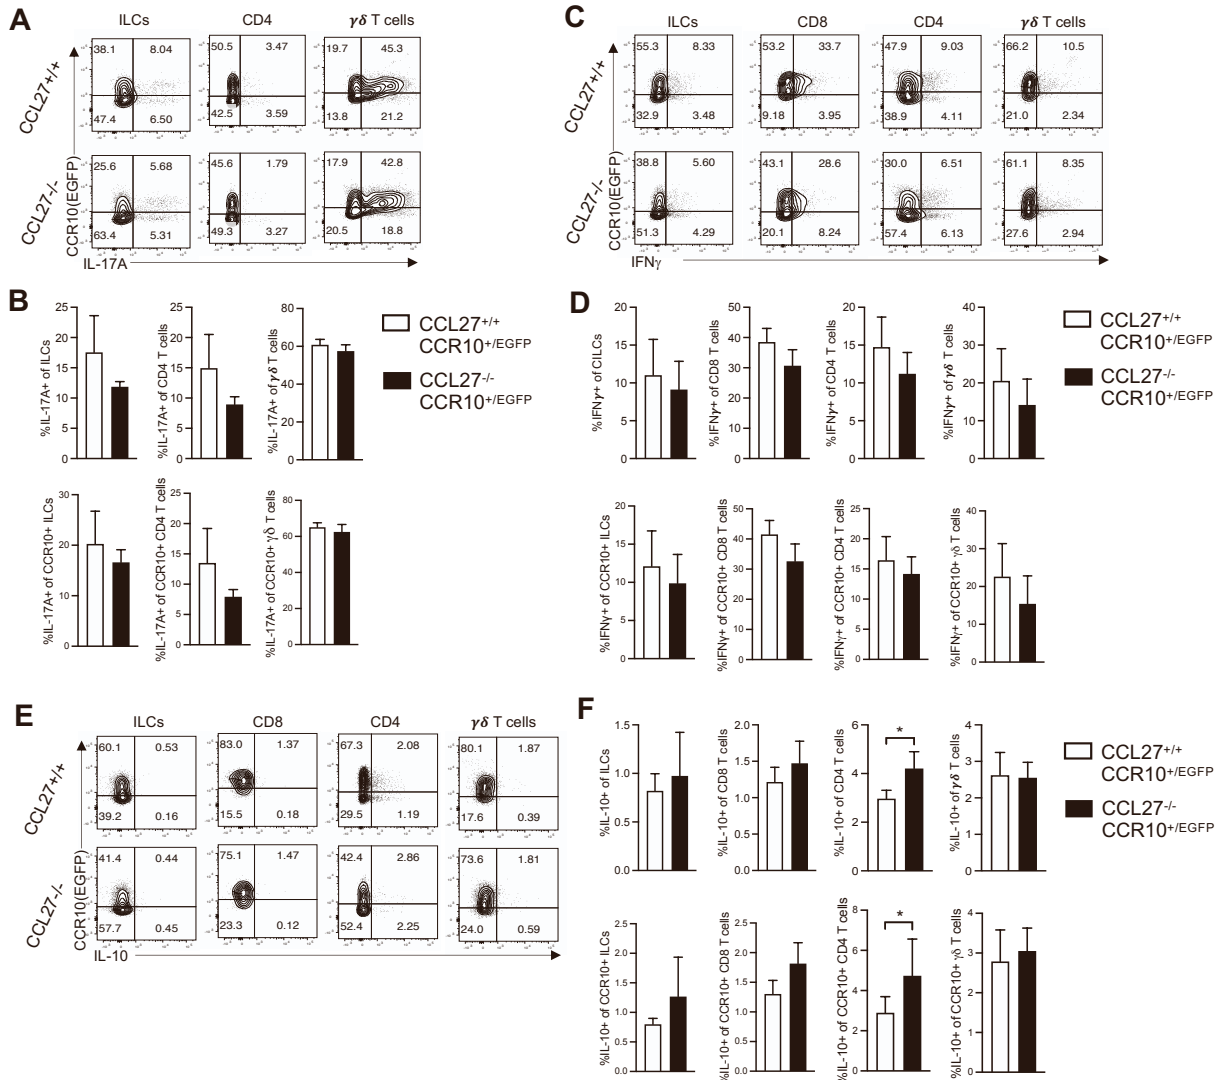

**Figure S4. Minor shifts in the cytokine production capacity of skin lymphocytes in CCL27<sup>-/-</sup> versus WT mice at steady state, related to Figure 4.** A-B) FC analysis (A) and graphed percentages (B) of IL-17A production of stimulated skin lymphocytes from adult CCL27<sup>+/+</sup>CCR10<sup>+/EGFP</sup> and CCL27<sup>-/-</sup>CCR10<sup>+/EGFP</sup> mice. N=7 mice for each genotype. C-D) FC analysis (C) and graphed percentages (D) of IFN $\gamma$  production of stimulated skin lymphocytes from adult CCL27<sup>+/+</sup>CCR10<sup>+/EGFP</sup> and CCL27<sup>-/-</sup>CCR10<sup>+/EGFP</sup> mice. N=6 mice each. E-F) FC analysis (E) and graphed percentages (F) of IL-10 production of stimulated skin lymphocytes from adult CCL27<sup>+/+</sup>CCR10<sup>+/EGFP</sup> and CCL27<sup>-/-</sup>CCR10<sup>+/EGFP</sup> mice. T cell populations are gated on CD45<sup>+</sup>CD3<sup>int</sup>CD8<sup>+</sup>, CD4<sup>+</sup> or  $\gamma\delta$ TCR<sup>+</sup>. ILCs are gated on CD45<sup>+</sup>Thy1.2<sup>+</sup>CD3<sup>-</sup>. N=5 mice for each genotype.

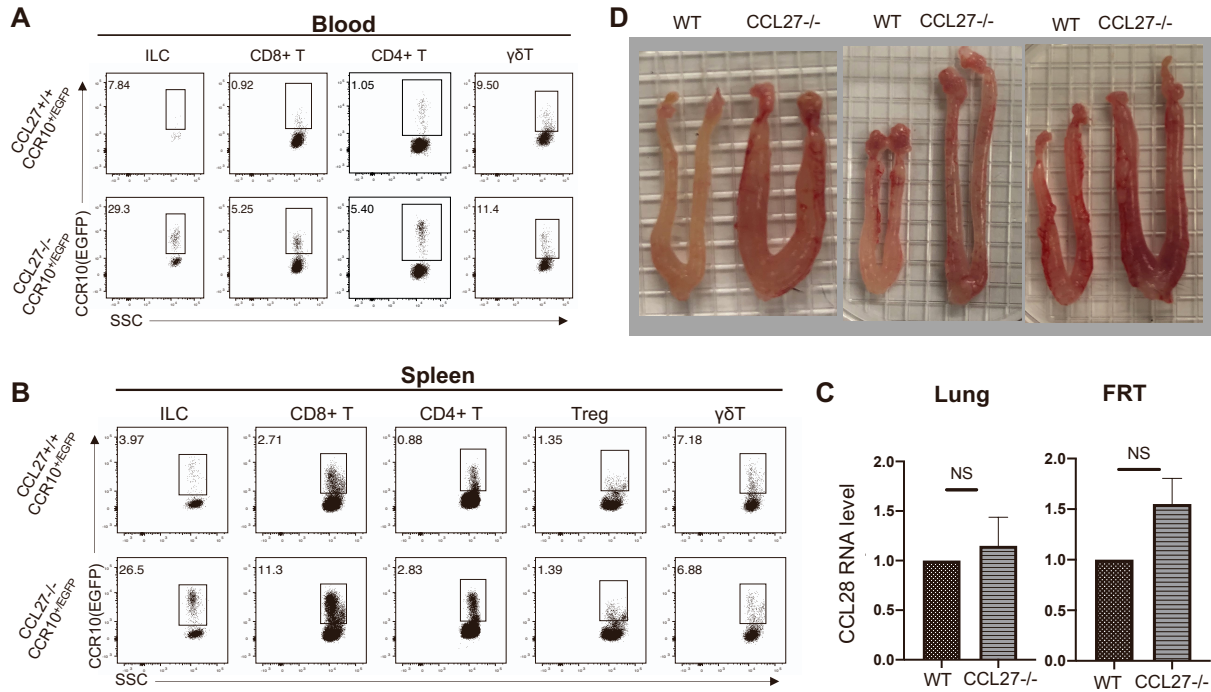

**Figure S5. Increased accumulation of CCR10<sup>+</sup> lymphocytes in the blood, spleens and lungs and female reproductive tracts of total CCL27-knockout mice, related to Figure 6. A-B)** FC analysis gating on populations of T cell subsets and ILCs for their CCR10(EGFP) expression in the spleen (A) and blood (B) of adult CCL27<sup>+/+</sup>CCR10<sup>+/EGFP</sup> and CCL27<sup>-/-</sup>CCR10<sup>+/EGFP</sup> mice. **C)** Real-time RT-PCR analysis of relative CCL28 expression in lungs and female reproductive tracts (FRT) of CCL27<sup>-/-</sup> mice in comparison to WT controls. Normalized to β-actin. N=4 each for lungs and 3 each for FRT. **D)** Images of uteri of three pairs of WT and CCL27<sup>-/-</sup> female littermate mice.
